# Supplementary material for: Survival Benefit of Renin-Angiotensin System Blockers in Critically Ill Cancer Patients: A Retrospective Study
Source: MDPI journal article supplement (doi:10.3390/cancers15123183), 2023-06-14
Supplement: s1 [file s1]

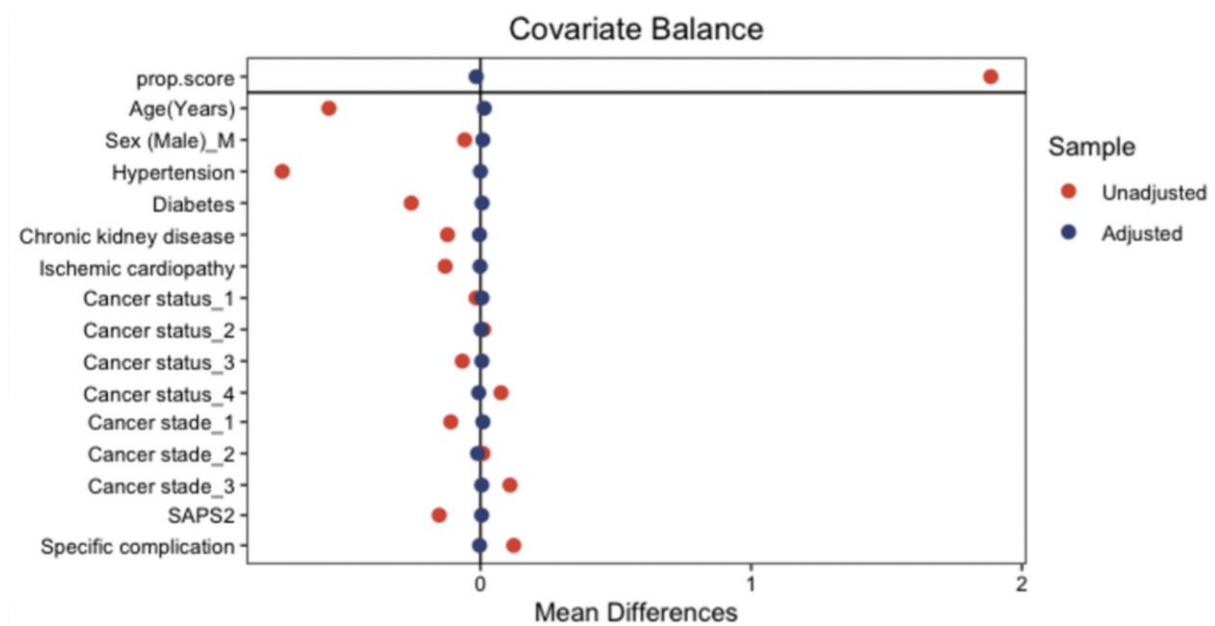

**Figure S1:** Balance of covariates in the adjusted and unadjusted cohort. Abbreviations: SAPS II: Simplified Acute Physiology Score II.
